# Supplementary material
Source: Springer Nature journal article supplement (https://www.springermedizin.de/resource/supplementary/12958_2010_779_MOESM7_ESM.pdf/9568478)

# A SUCROSE

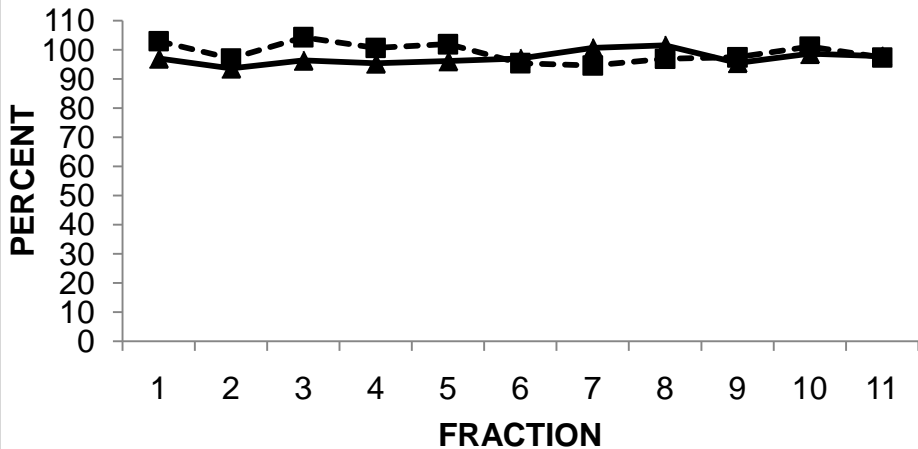

# B NYCODENZ

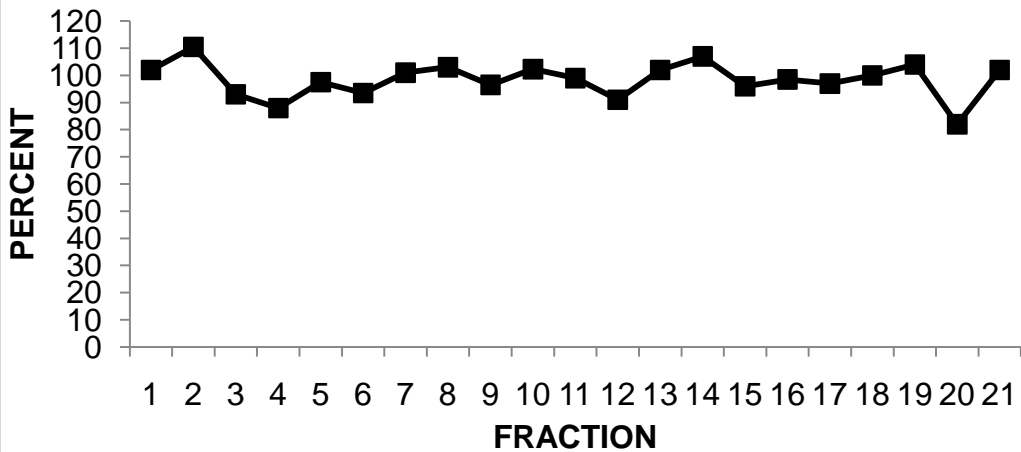

Supplement: MOESM7 [file 9568478]
